# Supplementary material for: “Cage-confinement” controlled dimensionality conversion of Bi2O2Se crystals towards high-performance phototransistors
Source: Royal Society of Chemistry journal article supplement (doi:10.1039/d4tc01025f), 2024-01-01
Supplement: d4tc01025f1.pdf [file d4tc01025f1.pdf]

## *Supporting Information*

### **“Cage-Confinement” Controlled Dimensionality Conversion of Bi<sub>2</sub>O<sub>2</sub>Se Crystals towards High-Performance Phototransistors**

*Kaiyi Zhang,<sup>a</sup> Fang Wang<sup>a</sup>, Lei Zheng,<sup>\*a</sup> Junqing Wei<sup>a</sup>, Yongxu Hu,<sup>b</sup> Yangyang Xie,<sup>a</sup> Hongling Guo,<sup>a</sup> Fengpu Zhang<sup>a</sup>, Xin Lin<sup>a</sup>, Zewen Li<sup>a</sup>, Tianling Ren<sup>c</sup>, Zhitang Song<sup>d</sup> and Kailiang Zhang<sup>\*a</sup>*

<sup>a</sup>, *Tianjin Key Laboratory of Film Electronic and Communication Devices, School of Integrated Circuit Science and Engineering, Tianjin University of Technology, Tianjin 300384, China.*

<sup>b</sup> *Key Laboratory of Organic Integrated Circuits, Ministry of Education, Institute of Molecular Aggregation Science, Department of Chemistry, School of Science, Tianjin University, Tianjin 300072, China*

<sup>c</sup> *Beijing National Research Center for Information Science and Technology Institute of Microelectronics, Tsinghua University, Beijing 100084, China*

<sup>d</sup> *Shanghai Institute of Microsystem and Information Technology, Chinese Academy of Sciences, Shanghai 200050, China.*

\*Corresponding authors.

E-mail address: [leizheng@tju.edu.cn](mailto:leizheng@tju.edu.cn)(Lei Zheng),

[kailiang\\_zhang2007@163.com](mailto:kailiang_zhang2007@163.com)(Kailiang Zhang)

**Keywords:** Bi<sub>2</sub>O<sub>2</sub>Se crystal, controllable dimension, “cage-confinement” growth, van der Waals integrated technique, photodetectors

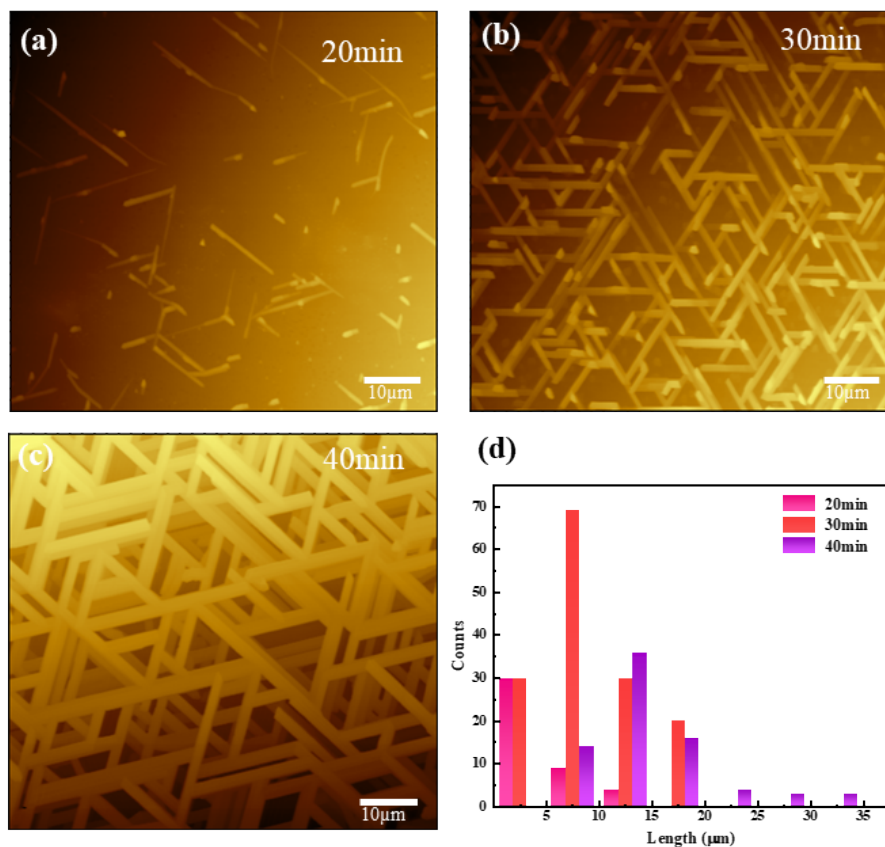

**Fig. S1.** AFM images of Bi<sub>2</sub>O<sub>2</sub>Se nanowires at different growth time. a) 20 min sample. b) 30 min sample. c) 40 min sample. d) Statistical diagram of Bi<sub>2</sub>O<sub>2</sub>Se nanowire lengths.

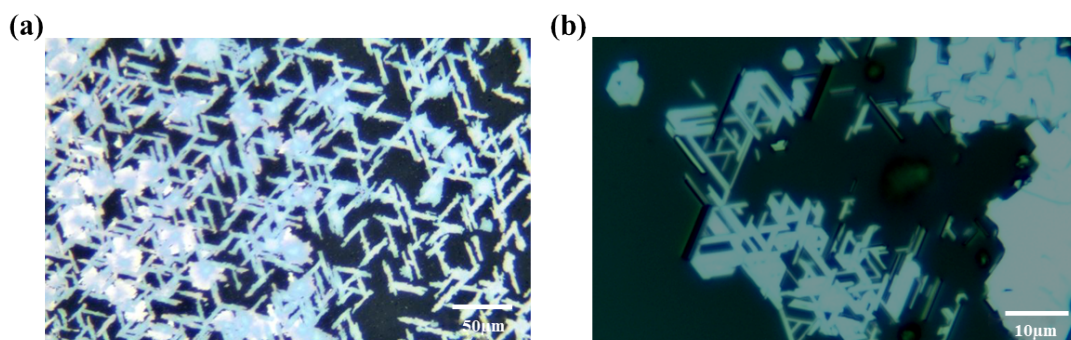

**Fig. S2.** OM images of Bi<sub>2</sub>O<sub>2</sub>Se crystals during the process of dimensional transformation (from 1D crystalline nanowires to 2D nanosheets). a) < 500 μm Active area with flow rate of ≈ 100 sccm. b) > 500 μm Active area with flow rate of ≈ 50 sccm.

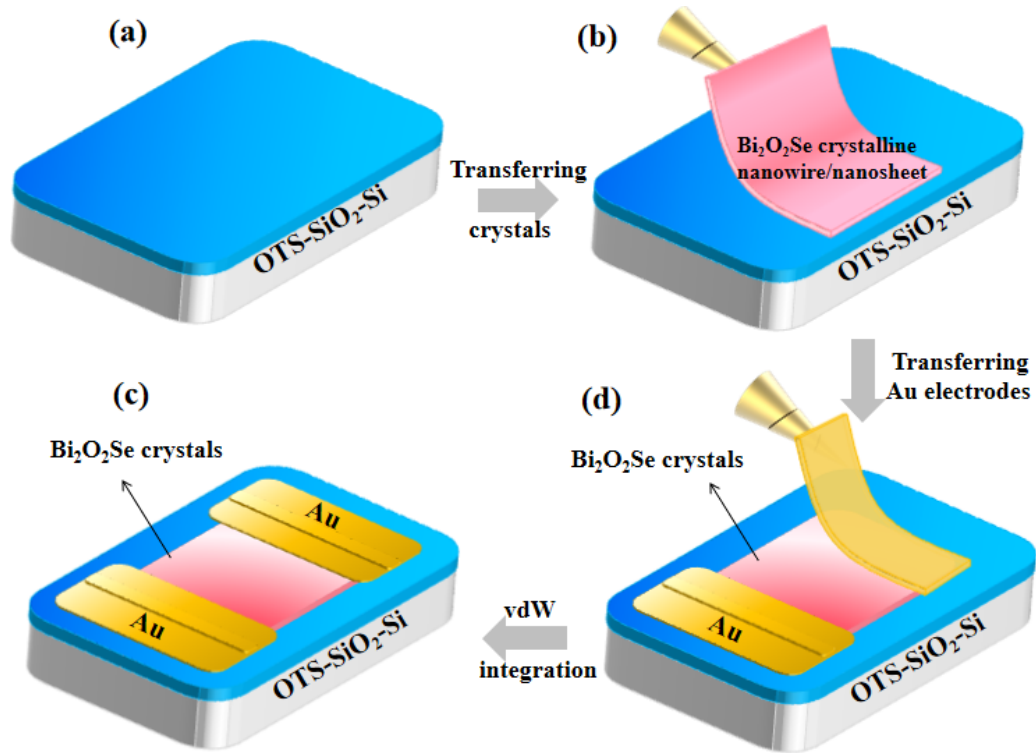

**Fig. S3.** Schematic illustration of the fabrication processes of Bi<sub>2</sub>O<sub>2</sub>Se-based FET. a) Incorporation of an OTS monolayer on the SiO<sub>2</sub> substrate. b) Mechanically transferring the Bi<sub>2</sub>O<sub>2</sub>Se single crystals with the help of probe. c) Stamping the source/drain electrodes onto the Bi<sub>2</sub>O<sub>2</sub>Se crystals with the help of probe. d) Schematic illustration of a bottom-gate-top-contact Bi<sub>2</sub>O<sub>2</sub>Se-based FET.

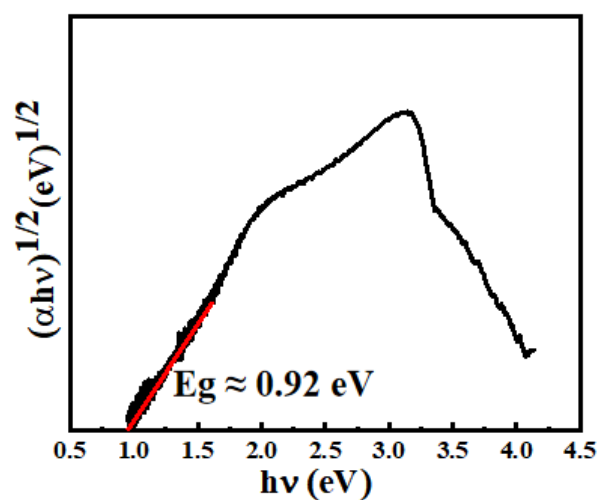

**Fig. S4.** Approximate value of  $E_g$  is calculated by a relationship known as the Tauc plot.

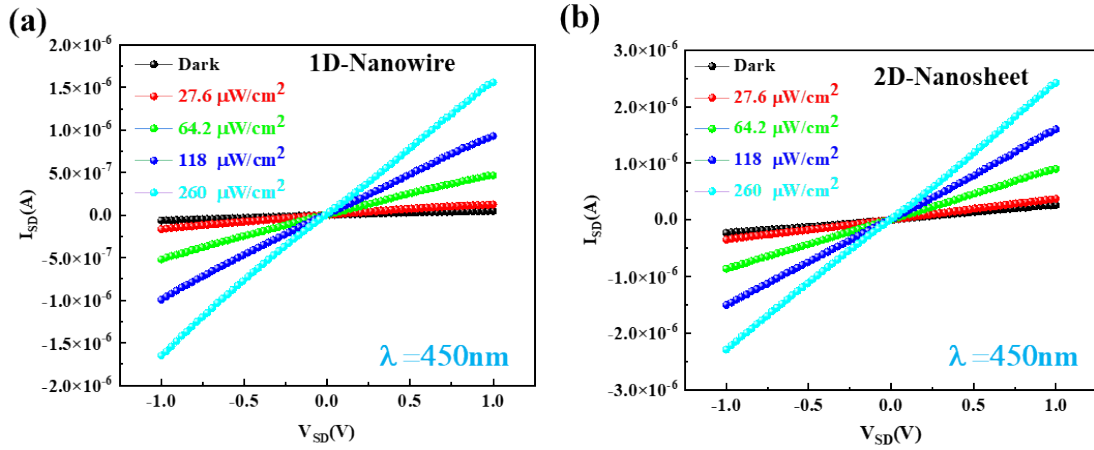

**Fig. S5.** (a, b) The  $I_{SD}$  output curves of 1D and 2D  $\text{Bi}_2\text{O}_2\text{Se}$ -based phototransistors under different light power densities conditions (measured at  $V_G = 60$  V and  $V_{SD} = 1$  V)

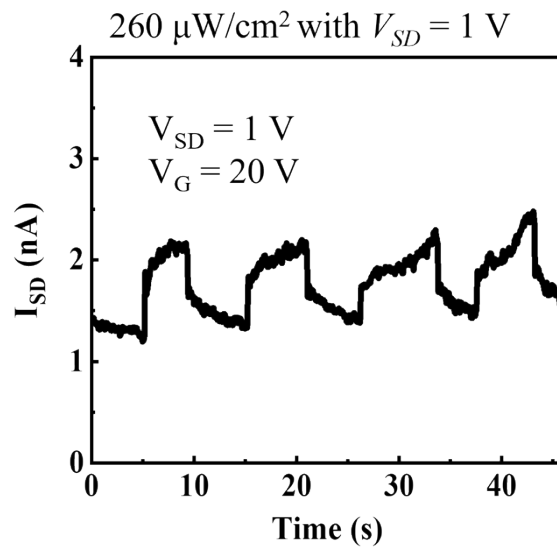

**Fig. S6.** Time-dependent photo-switching behaviors of  $\text{Bi}_2\text{O}_2\text{Se}$  nanoplate photodetector under the 450 nm laser illumination,  $P = 260$   $\mu\text{W}/\text{cm}^2$ , bias voltage  $V_{SD} = 1$  V and gate voltage  $V_G = 20$  V..

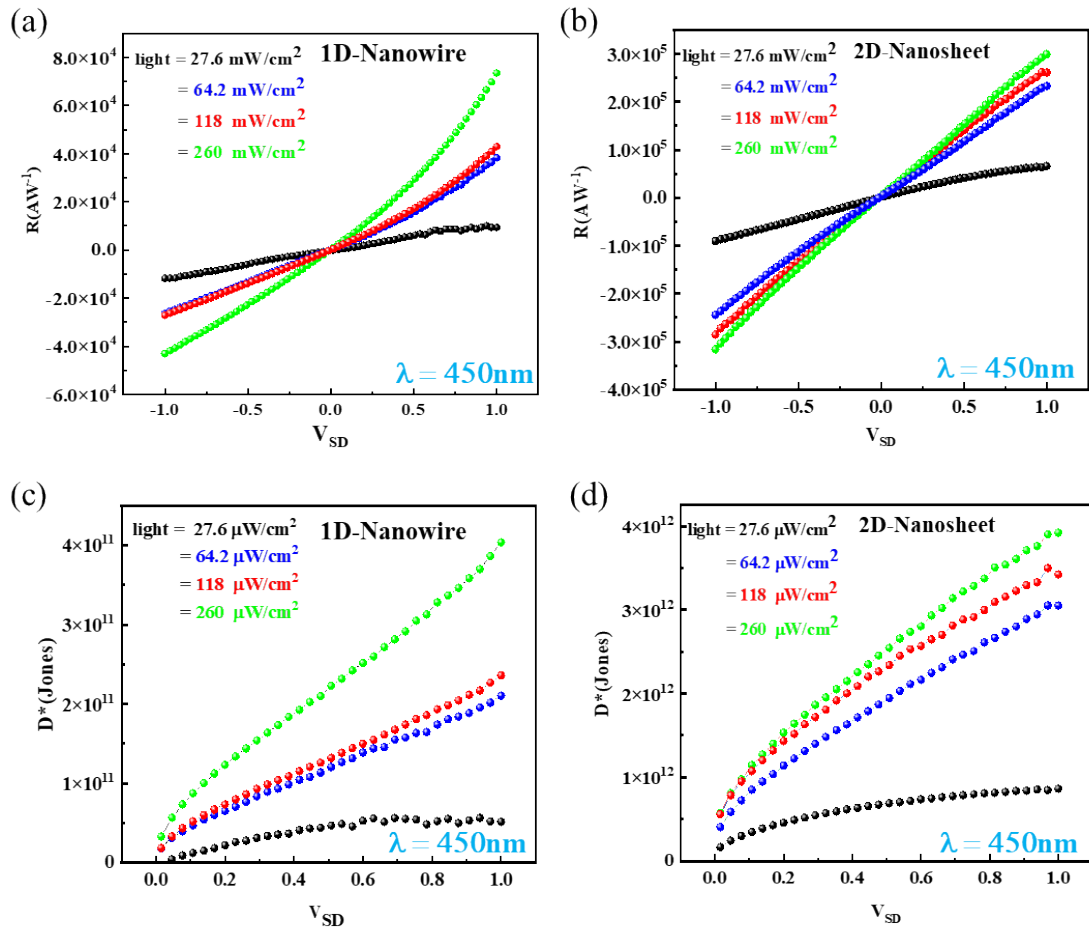

**Fig. S7.** (a, b) The  $R$  of  $\text{Bi}_2\text{O}_2\text{Se}$  nanowire/nanosheet devices at different light intensity levels, respectively. (c, d) The  $D^*$  of  $\text{Bi}_2\text{O}_2\text{Se}$  nanowire/nanosheet devices at different light intensity levels, respectively.

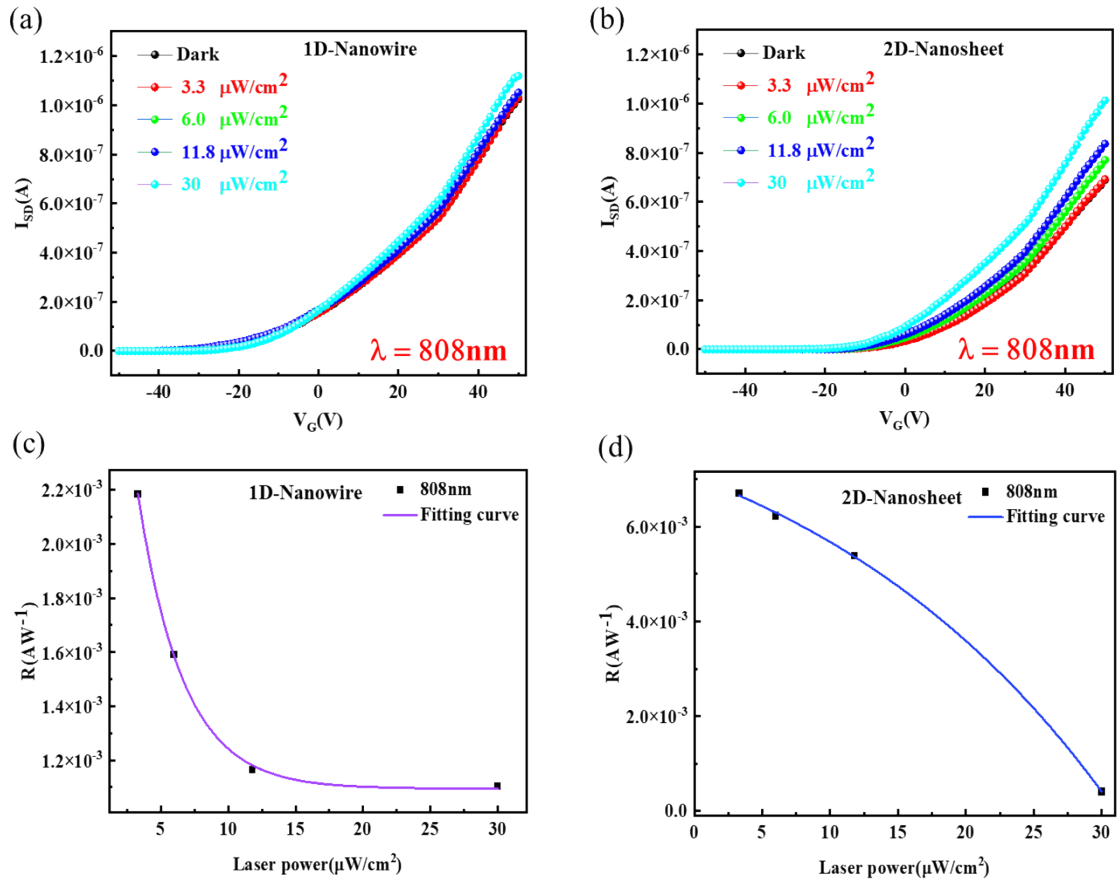

**Fig. S8.** (a, b) The  $I_{SD}$  transfer curves of 1D and 2D Bi<sub>2</sub>O<sub>2</sub>Se-based phototransistors under different light power densities conditions (measured at  $V_G = 60$  V and  $V_{SD} = 1$  V). (c, d) The  $R$  of Bi<sub>2</sub>O<sub>2</sub>Se 1D/2D devices at different light intensity levels, respectively.

**Table S1.** Comparison of the responsivity of present Bi<sub>2</sub>O<sub>2</sub>Se-based photodetectors.

| Semiconductor                                | $\lambda$ (nm) | Responsivity (A/W) | Ref. |
|----------------------------------------------|----------------|--------------------|------|
| Bi <sub>2</sub> O <sub>2</sub> Se nanosheet  | 360            | 75.14              | [1]  |
| Bi <sub>2</sub> O <sub>2</sub> Se nanosheet  | 360            | 108696             | [2]  |
| Bi <sub>2</sub> O <sub>2</sub> Se nanosheet  | 365            | 2.068              | [3]  |
| Bi <sub>2</sub> O <sub>2</sub> Se nanoplate  | 400            | 523                | [4]  |
| Bi <sub>2</sub> O <sub>2</sub> Se nanosheet  | 405            | 45134              | [5]  |
| Bi <sub>2</sub> O <sub>2</sub> Se nanosheet  | 405            | 43                 | [6]  |
| Bi <sub>2</sub> O <sub>2</sub> Se nanosheet  | 405            | 50055              | [2]  |
| Bi <sub>2</sub> O <sub>2</sub> Se nanosheet  | 500            | 1.2                | [7]  |
| Bi <sub>2</sub> O <sub>2</sub> Se nanosheet  | 500            | 193                | [7]  |
| Bi <sub>2</sub> O <sub>2</sub> Se film       | 520            | 6.1                | [8]  |
| Bi <sub>2</sub> O <sub>2</sub> Se nanosheet  | 532            | $3 \times 10^3$    | [9]  |
| Bi <sub>2</sub> O <sub>2</sub> Se nanosheet  | 532            | $2 \times 10^3$    | [10] |
| Bi <sub>2</sub> O <sub>2</sub> Se nanosheet  | 532            | $3.5 \times 10^4$  | [11] |
| Bi <sub>2</sub> O <sub>2</sub> Se nanosheet  | 532            | 45800              | [12] |
| Bi <sub>2</sub> O <sub>2</sub> Se nanosheet  | 532            | 60                 | [13] |
| Bi <sub>2</sub> O <sub>2</sub> Se nanosheet  | 532            | 842.91             | [14] |
| Bi <sub>2</sub> O <sub>2</sub> Se nanosheet  | 532            | 25505              | [2]  |
| Bi <sub>2</sub> O <sub>2</sub> Se nanoribbon | 590            | $9.2 \times 10^6$  | [15] |
| Bi <sub>2</sub> O <sub>2</sub> Se nanosheet  | 635            | 44                 | [6]  |
| Bi <sub>2</sub> O <sub>2</sub> Se nanosheet  | 640            | 9.1                | [16] |
| Bi <sub>2</sub> O <sub>2</sub> Se film       | 640            | $3.8 \times 10^6$  | [17] |
| Bi <sub>2</sub> O <sub>2</sub> Se nanosheet  | 650            | 3.94               | [3]  |
| Bi <sub>2</sub> O <sub>2</sub> Se nanosheet  | 660            | 22100              | [9]  |
| Bi <sub>2</sub> O <sub>2</sub> Se nanosheet  | 808            | 6.5                | [11] |
| Bi <sub>2</sub> O <sub>2</sub> Se nanosheet  | 808            | 843.5              | [2]  |
| Bi <sub>2</sub> O <sub>2</sub> Se nanowire   | 808            | 722.2              | [19] |

| Semiconductor                               | $\lambda$ (nm) | Responsivities (A/W) | Ref.      |
|---------------------------------------------|----------------|----------------------|-----------|
| Bi <sub>2</sub> O <sub>2</sub> Se nanosheet | 900            | 101                  | [18]      |
| Bi <sub>2</sub> O <sub>2</sub> Se nanosheet | 940            | 300                  | [21]      |
| Bi <sub>2</sub> O <sub>2</sub> Se nanosheet | 980            | 0.053                | [3]       |
| Bi <sub>2</sub> O <sub>2</sub> Se nanosheet | 1200           | 65                   | [22]      |
| Bi <sub>2</sub> O <sub>2</sub> Se nanosheet | 1260           | 3.5                  | [07]      |
| Bi <sub>2</sub> O <sub>2</sub> Se nanosheet | 1310           | 118                  | [2]       |
| Bi <sub>2</sub> O <sub>2</sub> Se nanosheet | 1550           | 22.12                | [2]       |
| Bi <sub>2</sub> O <sub>2</sub> Se nanosheet | 1550           | 58                   | [21]      |
| Bi <sub>2</sub> O <sub>2</sub> Se nanowire  | 450            | $3 \times 10^5$      | This work |
| Bi <sub>2</sub> O <sub>2</sub> Se nanosheet | 450            | $7.4 \times 10^4$    | This work |



## REFERENCES

- 1 M.-Q. Li, L.-Y. Dang, G.-G. Wang, F. Li, M. Han, Z.-P. Wu, G.-Z. Li, Z. Liu, J.-C. Han, Bismuth Oxychalcogenide Nanosheet: Facile Synthesis, Characterization, and Photodetector Application, *Adv. Mater. Technol.*, 2020, **5**(7), 2000180.
- 2 T. Tong, Y. Chen, S. Qin, W. Li, J. Zhang, C. Zhu, C. Zhang, X. Yuan, X. Chen, Z. Nie, X. Wang, W. Hu, F. Wang, W. Liu, P. Wang, X. Wang, R. Zhang, Y. Xu, Sensitive and Ultrabroadband Phototransistor Based on Two-Dimensional Bi<sub>2</sub>O<sub>2</sub>Se Nanosheets, *Adv. Funct. Mater.*, 2019, **29**(50), 1905806.
- 3 X. Xue, C. Ling, H. Ji, J. Wang, C. Wang, H. Lu, W. Liu, Self-Powered and Broadband Bismuth Oxyselenide/p-Silicon Heterojunction Photodetectors with Low Dark Current and Fast Response, *ACS Appl. Mater. Interfaces*, 2023, **15**(4), 5411-5419.
- 4 H. Wang, S. Zhang, X. Wu, H. Luo, J. Liu, Z. Mu, R. Li, G. Yuan, Y. Liang, J. Tan, Y. Ren, W. Lei, Bi<sub>2</sub>O<sub>2</sub>Se Nanoplates for Broadband Photodetector and Full-Color Imaging Applications, *Nano Res.*, 2023, **16**(5), 7638-7645.
- 5 M. Kang, H. Chai, H. B. Jeong, C. Park, I. Jung, E. Park, M. M. Çiçek, I. Lee, B. Bae, E. Durgun, J. Y. Kwak, S. Song, S. Choi, H. Y. Jeong, K. Kang, Low-Temperature and High-Quality Growth of Bi<sub>2</sub>O<sub>2</sub>Se Layered Semiconductors Via Cracking Metal-Organic Chemical Vapor Deposition, *ACS Nano*, 2021, **15**(5), 8715-8723.
- 6 L. Tao, S. Li, B. Yao, M. Xia, W. Gao, Y. Yang, X. Wang, N. Huo, Raman Anisotropy and Polarization-Sensitive Photodetection in 2D Bi<sub>2</sub>O<sub>2</sub>Se - WSe<sub>2</sub> Heterostructure, *ACS Omega*, 2021, **6**(50), 34763-34770.

- 7 J. Han, C. Fang, M. Yu, J. Cao, K. Huang, A High-Performance Schottky Photodiode with Asymmetric Metal Contacts Constructed on 2D Bi<sub>2</sub>O<sub>2</sub>Se, *Adv. Electron. Mater.*, 2022, **8**(7), 2100987.
- 8 X. Pang, Y. Zhao, X. Gao, G. Wang, H. Sun, J. Yin, J. Zhu, Two-Step Colloidal Synthesis of Micron-Scale Bi<sub>2</sub>O<sub>2</sub>Se Nanosheets and Their Electrostatic Assembly for Thin-Film Photodetectors with Fast Response, *Chin. Chem. Lett.*, 2021, **32**(10), 3099-3104.
- 9 U. Khan, Y. Luo, L. Tang, C. Teng, J. Liu, B. Liu, H.-M. Cheng, Controlled Vapor - Solid Deposition of Millimeter - Size Single Crystal 2D Bi<sub>2</sub>O<sub>2</sub>Se for High-Performance Phototransistors, *Adv. Funct. Mater.*, 2019, **29**(14), 1807979.
- 10 J. Wu, Y. Liu, Z. Tan, C. Tan, J. Yin, T. Li, T. Tu, H. Peng, Chemical Patterning of High-Mobility Semiconducting 2D Bi<sub>2</sub>O<sub>2</sub>Se Crystals for Integrated Optoelectronic Devices, *Adv. Mater.*, 2017, **29**(44), 1704060.
- 11 Q. Fu, C. Zhu, X. Zhao, X. Wang, A. Chaturvedi, C. Zhu, X. Wang, Q. Zeng, J. Zhou, F. Liu, B. K. Tay, H. Zhang, S. J. Pennycook, Z. Liu, Ultrasensitive 2D Bi<sub>2</sub>O<sub>2</sub>Se Phototransistors on Silicon Substrates, *Adv. Mater.*, 2019, **31**(1), 1804945.
- 12 D. Li, X. Han, G. Xu, X. Lui, X. Zhao, G. Li, H. Hao, J. Dong, H. Liu, J. Xing, Bi<sub>2</sub>O<sub>2</sub>Se Photoconductive Detector with Low Power Consumption and High Sensitivity, *Acta. Physica. Sinica.*, 2020, **69**(24), 248502.
- 13 X. Yang, Q. Zhang, Y. Song, Y. Fan, Y. He, Z. Zhu, Z. Bai, Q. Luo, G. Wang, G. Peng, M. Zhu, S. Qin, K. Novoselov, K. High Mobility Two-Dimensional Bismuth

- Oxyselenide Single Crystals with Large Grain Size Grown by Reverse-Flow Chemical Vapor Deposition, *ACS Appl. Mater. Interfaces*, 2021, **13**(41), 49153-49162.
- 14 L. Dang, M. Liu, G. Wang, D. Zhao, J. Han, J. Zhu, Z. Liu, Organic Ion Template - Guided Solution Growth of Ultrathin Bismuth Oxyselenide with Tunable Electronic Properties for Optoelectronic Applications, *Adv. Funct. Mater.*, 2022, **32**(31), 2201020.
- 15 U. Khan, L. Tang, B. Ding, Y. Luo, S. Feng, W. Chen, M. J. Khan, B. Liu, H. M. Cheng, Catalyst - Free Growth of Atomically Thin Bi<sub>2</sub>O<sub>2</sub>Se Nanoribbons for High - Performance Electronics and Optoelectronics, *Adv. Funct. Mater.*, 2021, **31**(31) 2101170.
- 16 Y. Song, Z. Li, H. Li, S. Tang, M. Jiang, Highly Efficient Broadband Photodetectors Based on Lithography-Free Au/Bi<sub>2</sub>O<sub>2</sub>Se/Au Heterostructures, *Nanoscale*, 2019, **11**(43), 20707-20714.
- 17 C. Hong, Y. Tao, A. Nie, M. Zhang, N. Wang, R. Li, J. Huang, Y. Huang, X. Ren, Y. Cheng, X. Liu, Inclined Ultrathin Bi<sub>2</sub>O<sub>2</sub>Se Films: a Building Block for Functional Van Der Waals Heterostructures, *ACS Nano*, 2020, **14**(12), 16803-16812.
- 18 J. Li, Z. Wang, Y. Wen, J. Chu, L. Yin, R. Cheng, L. Lei, P. He, C. Jiang, L. Feng, J. He, High - Performance Near - Infrared Photodetector Based on Ultrathin Bi<sub>2</sub>O<sub>2</sub>Se Nanosheets, *Adv. Funct. Mater.*, 2018, **28**(10), 1706437.

- 19 H. Yang, W. Chen, X. Zheng, D. Yang, Y. Hu, X. Zhang, X. Ye, Y. Zhang, T. Jiang, G. Peng, X. Zhang, R. Zhang, C. Deng, S. Qin, Near-Infrared Photoelectric Properties of Multilayer Bi<sub>2</sub>O<sub>2</sub>Se Nanofilms, *Nanoscale Res. Lett.* 2019, **14**, 371.
- 20 J. Li, Z. Wang, J. Chu, Z. Cheng, P. He, J. Wang, L. Yin, R. Cheng, N. Li, Y. Wen, J. He, Oriented Layered Bi<sub>2</sub>O<sub>2</sub>Se Nanowire Arrays for Ultrasensitive Photodetectors, *Appl. Phys. Lett.* 2019, **114**(15), 151104.
- 21 Y. Chen, W. Ma, C. Tan, M. Luo, W. Zhou, N. Yao, H. Wang, L. Zhang, T. Xu, T. Tong, Y. Zhou, Y. Xu, C. Yu, C. Shan, H. Peng, F. Yue, P. Wang, Z. Huang, W. Hu, Broadband Bi<sub>2</sub>O<sub>2</sub>Se Photodetectors from Infrared to Terahertz, *Adv. Funct. Mater.*, 2021, **31**(14), 2009554.
- 22 J. Yin, Z. Tan, H. Hong, J. Wu, H. Yuan, Y. Liu, C. Chen, C. Tan, F. Yao, T. Li, Y. Chen, Z. Liu, K. Liu, H. Peng, Ultrafast and Highly Sensitive Infrared Photodetectors Based on Two-Dimensional Oxyselenide Crystals, *Nat. Commun.*, 2018, **9**(1), 3311.
